# Supplementary material for: Is Short-Read 16S rRNA Sequencing of Oral Microbiome Sampling a Suitable Diagnostic Tool for Head and Neck Cancer?
Source: Preprints.org preprint supplement (doi:10.20944/preprints202408.1882.v1), 2024-08-27
Supplement: Supplementary file 1 [file supplementary]

## Sheet: Table S1
Table S 1: Risk of bias and search terms. A) Information for Risk of Bias, B) Search terms.
Table S1A) Risk of bias assessment of the included studies and search terms. Assessment was performed using RoB2 tools (ROB2_IRPG_beta_v9 excel version downloaded from https://www.riskofbias.info/).	Accession number	Domain 1: Randomization process	Domain 2. Deviations from intended interventions	Domain 3. Mising outcome data	Domain 4. Measurement of the outcome	Domain 5. Selection of the reported result	Overall
	PRJEB18476	Low risk	Low risk	Low risk	Low risk	Low risk	Low risk
	PRJEB37299	Low risk	Low risk	Low risk	Low risk	Low risk	Low risk
	PRJEB37501	Low risk	Low risk	Low risk	Low risk	Low risk	Low risk
	PRJEB39064	Low risk	Low risk	Low risk	Low risk	Low risk	Low risk
	PRJNA386665	Low risk	Low risk	Low risk	Low risk	Low risk	Low risk
	PRJNA421234	Low risk	Low risk	Low risk	Low risk	Low risk	Low risk
	PRJNA548462	Low risk	Low risk	Low risk	Low risk	Low risk	Low risk
	PRJNA596113	Low risk	Low risk	Low risk	Low risk	Low risk	Low risk
	PRJNA685226	Low risk	Low risk	Low risk	Low risk	Low risk	Low risk
	PRJNA700849	Low risk	Low risk	Low risk	Low risk	Low risk	Low risk
	PRJNA722880	Low risk	Low risk	Low risk	Low risk	Low risk	Low risk
	PRJNA744870	Low risk	Low risk	Low risk	Low risk	Low risk	Low risk
	PRJNA866676	Low risk	Low risk	Low risk	Low risk	Low risk	Low risk
	PRJNA870048	Low risk	Low risk	Low risk	Low risk	Low risk	Low risk
	PRJNA901226	Low risk	Low risk	Low risk	Low risk	Low risk	Low risk
	PRJNA997108	Low risk	Low risk	Low risk	Low risk	Low risk	Low risk
	PRJNA412445	Low risk	Low risk	Low risk	Low risk	Low risk	Low risk
1B: Search terms. Search is performed on Date: 01/02/2024
Database	Search terms
PubMed	("Oral" OR "Mouth" OR "Saliva" OR "Rinse" OR "Oral rinse" OR "Swab" OR "swabs" OR "Brush" OR "brushes") AND ("microbiome" OR "microbial" OR "bacteria" OR "microbiota") AND ("16S" OR "16S sequencing" OR "16S amplicon sequencing" OR "16S rRNA sequencing" OR "16S rRNA" OR "16S rDNA" OR "16S rRNA gene amplicon sequencing") AND ("carcinoma" OR "carcinomas" OR "cancer" OR "cancers")
Scopus	("Oral" OR "Mouth" OR "Saliva" OR "Rinse" OR "Oral rinse" OR "Swab" OR "swabs" OR "Brush" OR "brushes") AND ("microbiome" OR "microbial" OR "bacteria" OR "microbiota") AND ("16S" OR "16S sequencing" OR "16S amplicon sequencing" OR "16S rRNA sequencing" OR "16S rRNA" OR "16S rDNA" OR "16S rRNA gene amplicon sequencing") AND ("carcinoma" OR "carcinomas" OR "cancer" OR "cancers")
EMBASE	("Oral" OR "Mouth" OR "Saliva" OR "Rinse" OR "Oral rinse" OR "Swab" OR "swabs" OR "Brush" OR "brushes") AND ("microbiome" OR "microbial" OR "bacteria" OR "microbiota") AND ("16S" OR "16S sequencing" OR "16S amplicon sequencing" OR "16S rRNA sequencing" OR "16S rRNA" OR "16S rDNA" OR "16S rRNA gene amplicon sequencing") AND ("carcinoma" OR "carcinomas" OR "cancer" OR "cancers")

## Sheet: Table S2
Table S2: Samples information and study batch post filtering and processing					Samples
Samples included for analysis per study (Refer to Supplementary document)	BioProject	Paper	Primer	Sample type	HNC	Healthy	Premalignant	Total (per study)
	PRJNA596113	The intersection between oral microbiota, host gene methylation and patient outcomes in head and neck squamous cell carcinoma	V3V4	Oral rinse	53	46	0	99
	PRJNA744870	Restoration of the Oral Microbiota After Surgery for Head and Neck Squamous Cell Carcinoma Is Associated With Patient Outcomes	V3V4	Oral rinse	74	39	0	113
	PRJNA870048	Convergent dysbiosis of upper aerodigestive microbiota between patients with esophageal and oral cavity squamous cell carcinoma	V3V4	Oral rinse	79	45	0	124
	PRJEB37501	Carcinogenesis of Male Oral Submucous Fibrosis Alters Salivary Microbiomes	V3V4	Saliva	42	0	22	64
	PRJEB39064	Taxonomic and Functional Dysregulation in Salivary Microbiomes During Oral Carcinogenesis	V3V4	Saliva	27	27	21	75
	PRJNA421234	Microbial and inflammatory-based salivary biomarkers of head and neck squamous cell carcinoma	V3V4	Saliva	0	7	0	7
	PRJNA548462	Microbiome analysis of saliva from oral squamous cell carcinoma (OSCC) patients and tobacco abusers with potential biomarkers for oral cancer screening	V3V4	Saliva	8	15	0	23
	PRJNA685226	Human papillomavirus infection and tumor microenvironment are associated with the microbiota in patients with oropharyngeal cancers-pilot study	V3V4	Saliva	9	0	0	9
	PRJNA866676	Characteristics of Microbial Distribution in Different Oral Niches of Oral Squamous Cell Carcinoma	V3V4	Saliva	63	0	0	63
	PRJNA901226	Dysbiosis in Head and Neck Cancer: Determining Optimal Sampling Site for Oral Microbiome Collection	V3V4	Saliva	21	47	0	68
	PRJEB18476	The salivary microbiome as an indicator of carcinogenesis in patients with oropharyngeal squamous cell carcinoma: A pilot study	V4	Saliva	11	11	0	22
	PRJEB37299	Preliminary insights into the impact of primary radiochemotherapy on the salivary microbiome in head and neck squamous cell carcinoma	V4	Saliva	57	21	0	78
	PRJNA386665	Bacterial alterations in salivary microbiota and their association in oral cancer	V4	Saliva	119	127	129	375
	PRJNA700849	Meta-omics analysis indicates the saliva microbiome and its proteins associated with the prognosis of oral cancer patients	V4	Saliva	43	21	0	64
	PRJNA997108	Salivary microbiome profiles of oral cancer patients analyzed before and after treatment	V4	Saliva	99	102	0	201
	PRJNA722880	The human oral - nasopharynx microbiome as a risk screening tool for nasopharyngeal carcinoma	V4V5	Saliva	9	29	0	38
	Total				714	537	172	1423
Sample removed from subsequent per primer analysis (refer to supplementary document at V4V5)	BioProject	Paper	Primer	Sample type	HNC	Healthy	Premalignant	Total
	PRJNA412445	The Clinical Potential of Oral Microbiota as a Screening Tool for Oral Squamous Cell Carcinomas	V4V5	Saliva	17	0	0	17

## Sheet: Table S3
Table S3: Alpha diversity analysis statistics for saliva samples. Shannon diversity was measured for all samples using MMUPHin-adjusted rarefied abundance. Kruskal-Wallis test with Dunn’s multiple comparison and Mann-Whitney test were performed to compared different sample groups, black line represents median. ****p < 0.0001, ***p < 0.001, **p < 0.01, *p < 0.05, ns – not shown.
	V3V4 Primer HNC v.s. Healthy	Bioproject ID	HNC Median	HNC 95% CI	Healthy Median	Healthy 95% CI	Direction	P-value	P-adjusted (for Dunn's multiple comparison)
		PRJEB39064	2.46026	1.251-2.943	2.57083	1.511-3.025	Healthy > HNC	0.4094	>0.9999
		PRJNA548462	2.04068	0-2.702	2.51987	0-3.052	Healthy > HNC	0.0896	0.2689
		PRJNA901226	1.64539	0.169-2.36	1.98148	1.233-2.479	Healthy > HNC	0.0039	0.0118
		PRJNA866676	0.89071	0.158-1.728	NA	NA	NA	NA	NA
		PRJNA685226	1.9389	1.441-2.136	NA	NA	NA	NA	NA
	V3V4 Primer HNC v.s. Premalignant	Bioproject ID	HNC Median	HNC 95% CI	Premalignant Median	Premalignant 95% CI	Direction	P-value	P-adjusted (for Dunn's multiple comparison)
		PRJEB37501	1.96057	0.124-2.680	1.70429	0.019-2.578	Premalignant > HNC	0.7022	>0.9999
		PRJEB39064	2.46026	1.251-2.943	2.49022	1.578-3.054	Premalignant > HNC	0.8854	>0.9999
	V3V4 Primer Pooled analysis	HNC Median	HNC 95% CI	Premalignant Median	Premalignant 95% CI	Healthy Median	Healthy 95% CI
		1.64	1.427-1.661	2.309	1.783-2.265	2.223	2.061-2.273
	Kruskal-Wallis with Dunn's multiple comparison	Median Difference	95% CI	Adjusted p value
	HNC - Premalignant	-0.6688	-0.7784 to -0.2571	< 0.0001
		Median Difference	95% CI	Adjusted p value
	HNC - Healthy	-0.5826	-0.7794 to -0.4212	< 0.0001
		Median Difference	95% CI	Adjusted p value
	Healthy - Premalignant	-0.0863	-0.1731 to 0.2618	ns
	V4 Primer HNC v.s. Healthy	Bioproject ID	HNC Median	HNC 95% CI	Healthy Median	Healthy 95% CI	Direction	P-value	P-adjusted (for Dunn's multiple comparison)
		PRJEB18476	2.6385	1.574-3.014	2.4007	2.016-2.898	HNC > Healthy	0.1164	0.582
		PRJEB37299	1.68869	0.754-2.163	1.71738	0.675-2.247	Healthy > HNC	0.2171	>0.9999
		PRJNA386665	2.11304	1.527-2.586	2.17285	1.361-2.645	Healthy > HNC	0.2338	>0.9999
		PRJNA700849	0.840295	0.039-1.368	0.999247	0.059-1.474	Healthy > HNC	0.3614	>0.9999
		PRJNA997108	1.89529	1.102-2.485	1.94968	1.347-2.383	Healthy > HNC	0.5902	>0.9999
	V4 Primer HNC v.s. Premalignant	Bioproject ID	HNC Median	HNC 95% CI	Premalignant Median	Premalignant 95% CI	Direction	P-value	P-adjusted (for Dunn's multiple comparison)
		PRJNA386665	2.113	1.527 - 2.586	2.166	1.455-2.583	Premalignant > HNC	0.1512	NA
	V4 Primer Pooled analysis	HNC Median	HNC 95% CI	Premalignant Median	Premalignant 95% CI	Healthy Median	Healthy 95% CI
		1.883	1.735-1.853	2.166	2.063-2.185	1.995	1.870-1.986
	Kruskal-Wallis with Dunn's multiple comparison	Median Difference	95% CI	Adjusted p value
	HNC - Premalignant	-0.2824	-0.3708 to -0.1895	<0.0001
		Median Difference	95% CI	Adjusted p value
	HNC - Healthy	-0.1117	-0.1982 to -0.0426	0.0083
		Median Difference	95% CI	Adjusted p value
	Healthy - Premalignant	-0.1707	-0.2420 to 0.07764	0.0006
	V4V5 Primer HNC v.s. Healthy	Bioproject ID	HNC Median	HNC 95% CI	Healthy Median	Healthy 95% CI	Direction	P-value	P-adjusted (for Dunn's multiple comparison)
		PRJNA722880	1.914	1.715-2.246	2.161	1.593-2.811	Healthy > HNC	0.00653	NA

## Sheet: Table S4
Table S4: Alpha diversity analysis statistics for oral rinse samples. Shannon diversity was measured for all samples using MMUPHin-adjusted rarefied abundance. Kruskal-Wallis test with Dunn’s multiple comparison and Mann-Whitney test were performed to compared different sample groups, black line represents median. ****p < 0.0001, ***p < 0.001, **p < 0.01, *p < 0.05, ns – not shown.
	V3V4 Primer HNC v.s. Healthy	Bioproject ID	HNC Median	HNC 95% CI	Healthy Median	Healthy 95% CI	Direction	P-value	P-adjusted (for Dunn's multiple comparison)
		PRJNA596113	1.89155	0.958-2.45	0.965169	0-1.903	HNC > Healthy	<0.0001	<0.0001
		PRJNA744870	1.85817	0.681-2.429	0.980794	0-1.883	HNC > Healthy	<0.0001	<0.0001
		PRJNA870048	1.70781	0.784-2.37	0.954441	0-1.94	HNC > Healthy	<0.0001	<0.0001
	V3V4 Primer Pooled analysis	HNC Median	HNC 95% CI	Healthy Median	Healthy 95% CI	Median Difference	95% CI	P-value
		1.832	1.632-1.784	0.9683	0.7779-0.9846	0.864	0.7411 to 0.9761	<0.0001

## Sheet: Table S5
Table S5: Beta-diversity analysis for saliva based on rarefied relative abundance. Differences in β-diversity between HNC, Premalignant, and Healthy saliva were assessed using PCoA plot of Bray-Curtis distance on rarefied relative abundance and PERMANOVA test was performed. Dispersion was tested using betadisper, to determine if dispersion was significantly different between sample groups. Permut…
PERMANOVA	Saliva V3V4		Df	SumOfSqs	R2	F	Pr(>F)
	Overall PERMANOVA	Overall	2	5.655	0.06634	10.871	0.001	***
	Pairwise PERMANOVA	HNC v.s. Healthy	1	4.283	0.0584	16.373	0.001	***
		HNC v.s. Premalignant	1	1.995	0.03045	6.6259	0.001	***
	Saliva V4		Df	SumOfSqs	R2	F	Pr(>F)
	Overall PERMANOVA	Overall	2	2.604	0.024	9.0599	0.001	***
	Pairwise PERMANOVA	HNC v.s. Healthy	1	1.593	0.01749	10.84	0.001	***
		HNC v.s. Premalignant	1	1.657	0.02382	11.126	0.001	***
	Saliva V4V5		Df	SumOfSqs	R2	F	Pr(>F)
	Overall PERMANOVA	HNC v.s. Healthy	1	0.3391	0.07794	3.0432	0.004	**
Beta-dispersion (betadisper)	Saliva V3V4		Pr(>F)
	Permutation test for homogeneity of multivariate dispersions	Overall	0.001	***
	Pairwise betadisper	HNC v.s. Healthy	9.4135e-25	***
		HNC v.s. Premalignant	0.00029286	***
	Saliva V4		Pr(>F)
	Permutation test for homogeneity of multivariate dispersions	Overall	0.003	**
	Pairwise betadisper	HNC v.s. Healthy	0.006	**
		HNC v.s. Premalignant	0.007	**
	Saliva V4V5		Pr(>F)
	Overall betadisper	HNC v.s. Healthy	0.261	n.s.

## Sheet: Table S6
Table S6: Beta-diversity analysis for saliva based on CLR-abundance. Differences in β-diversity between HNC, Premalignant, and Healthy saliva were assessed using PCoA plot of Euclidean distance on CLR-abundance and PERMANOVA test was performed. Dispersion was tested using betadisper, to determine if dispersion was significantly different between sample groups. Permutation n = 999
PERMANOVA	Saliva V3V4		Df	SumOfSqs	R2	F	Pr(>F)
	Overall PERMANOVA	Overall	2	9557	0.06332	10.343	0.001	***
	Pairwise PERMANOVA	HNC v.s. Healthy	1	8041	0.06268	17.653	0.001	***
		HNC v.s. Premalignant	1	2505	0.02533	5.484	0.001	***
	Saliva V4		Df	SumOfSqs	R2	F	Pr(>F)
	Overall PERMANOVA	Overall	2	6508	0.0276	10.461	0.001	***
	Pairwise PERMANOVA	HNC v.s. Healthy	1	1908	0.0099	6.0898	0.001	***
		HNC v.s. Premalignant	1	4540	0.0304	14.296	0.001	***
	Saliva V4V5		Df	SumOfSqs	R2	F	Pr(>F)
	Overall PERMANOVA	HNC v.s. Healthy	1	193.5	0.02452	0.905	0.571	ns
Beta-dispersion (betadisper)	Saliva V3V4		Pr(>F)
	Permutation test for homogeneity of multivariate dispersions	Overall	0.027	*
	Pairwise betadisper	HNC v.s. Healthy	0.04833	***
		HNC v.s. Premalignant	0.064059	n.s.
	Saliva V4		Pr(>F)
	Permutation test for homogeneity of multivariate dispersions	Overall	0.015	*
	Pairwise betadisper	HNC v.s. Healthy	0.011	*
		HNC v.s. Premalignant	0.049	*
	Saliva V4V5		Pr(>F)
	Overall betadisper	HNC v.s. Healthy	0.418	n.s.

## Sheet: Table S7
Table S7: Beta-diversity analysis for oral rinse based on rarefied relative abundance. Differences in β-diversity between HNC, and Healthy oral rinse were assessed using PCoA plot of Bray-Curtis distance on rarefied relative abundance and PERMANOVA test was performed. Dispersion was tested using betadisper, to determine if dispersion was significantly different between sample groups. Permutation …
	Oral rinse PERMANOVA (Bray - Rarefied relative abundance)	Oral rinse V3V4		Df	SumOfSqs	R2	F	Pr(>F)
		Overall PERMANOVA	HNC v.s. Healthy	1	7.566	0.07973	28.936	0.001	***
	Oral rinse beta-dispersion (Bray - Rarefied relative abundance)	Oral rinse V3V4		Pr(>F)
		Permutation test for homogeneity of multivariate dispersions	HNC v.s. Healthy	0.001	***

## Sheet: Table S8
Table S8: Beta-diversity analysis for oral rinse based on CLR-abundance. Differences in β-diversity between HNC, Premalignant, and Healthy oral rinse were assessed using PCoA plot of Euclidean distance on CLR-abundance and PERMANOVA test was performed. Dispersion was tested using betadisper, to determine if dispersion was significantly different between sample groups. Permutation n = 999
	Oral rinse PERMANOVA (Euclidean - CLR)	Oral rinse V3V4		Df	SumOfSqs	R2	F	Pr(>F)
		Overall PERMANOVA	HNC v.s. Healthy	1	5214	0.08261	30.076	0.001	***
	Oral rinse beta-dispersion (Euclidean - CLR)	Oral rinse V3V4		Pr(>F)
		Permutation test for homogeneity of multivariate dispersions	HNC v.s. Healthy	0.001	***

## Sheet: Table S9
Table S9: Relative abundance for saliva and oral rinse. Overall and patient type relative abundance of (a) saliva and (b) oral rinse at the genus level. Top abundance at the genera level for all saliva facet by per primer. Mean, standard deviation, and standard error of all saliva samples were calculated		Overall (all V3V4 saliva)			HNC			Healthy			Premalignant
Table S9a: Relative abundance of genera for saliva samples	V3V4 Primer	Mean	SD	SE	Mean	SD	SE	Mean	SD	SE	Mean	SD	SE
	Prevotella	19.63	21.88	0.2506	21.0551	26.215	2.0106	21.783	15.2499	1.55644	9.20324	9.45734	1.44223
	Streptococcus	13.42	17.39	0.4951	13.3975	18.9463	1.45311	11.0082	12.9648	1.32322	18.9035	18.6763	2.84811
	Fusobacterium	9.348	19.94	0.19	14.83	25.3358	1.94317	2.59094	4.49305	0.45857	2.75968	4.11325	0.627265
	Veillonella	8.783	10.84	0.3302	6.19165	10.1704	0.780032	12.7567	9.52321	0.971959	10.1545	13.235	2.01831
	Neisseria	8.385	13.79	1.245	5.09835	11.2766	0.864876	12.7606	15.235	1.55492	11.6072	16.0854	2.453
	Porphyromonas	6.046	13.43	0.5547	5.23393	12.4045	0.951385	5.38249	6.41673	0.654905	10.7366	24.1634	3.68488
	Capnocytophaga	3.926	9.751	0.6167	5.51512	12.4928	0.958152	1.8003	3.32719	0.33958	2.38999	4.61929	0.704435
	Leptotrichia	2.781	8.704	0.7842	2.5026	10.9987	0.843562	3.31658	4.39306	0.448365	2.68495	4.91552	0.74961
	Rothia	2.426	6.847	0.1313	2.17276	8.36378	0.641472	2.87346	4.51478	0.460788	2.42491	3.93365	0.599876
	Treponema	2.087	4.405	0.02423	2.68235	5.54877	0.425571	1.26073	1.94864	0.198882	1.57539	2.55457	0.389568
	Haemophilus	2.074	4.106	0.3895	1.19552	3.5688	0.273715	3.48704	4.21548	0.430241	2.39176	4.94248	0.753721
	Alloprevotella	1.847	5.804	0.2336	1.98908	7.33386	0.562481	2.19952	3.47412	0.354576	0.500102	1.03904	0.158452
	Gemella	1.533	3.339	1.134	1.79113	3.88866	0.298247	1.15896	2.73923	0.279572	1.35002	1.82479	0.278278
	Actinomyces	0.9161	2.308	0.7639	0.531457	1.25931	0.0965846	1.55756	3.49239	0.35644	1.00435	1.88195	0.286994
		Overall (all V4 saliva)			HNC			Healthy			Premalignant
	V4 Primer	Mean	SD	SE	Mean	SD	SE	Mean	SD	SE	Mean	SD	SE
	Streptococcus	31.08	18.09	0.6649	35.0063	19.3651	1.06763	28.7785	17.4968	1.04192	26.1058	13.3969	1.17953
	Prevotella	12.98	12.5	0.4595	11.4338	12.172	0.671064	14.385	13.0301	0.775933	13.8545	11.7574	1.03519
	Veillonella	11.64	11.52	0.4236	9.62105	10.0829	0.555887	13.6651	12.3653	0.736341	12.3894	12.2609	1.07951
	Neisseria	10.48	10.69	0.3931	9.6506	11.1667	0.615643	11.0541	10.5164	0.626241	11.3572	9.72096	0.855883
	Rothia	5.024	6.364	0.234	4.62935	6.48568	0.357567	5.70556	6.24251	0.371736	4.53788	6.23342	0.548822
	Fusobacterium	4.65	7.254	0.2667	4.9964	8.24362	0.454486	4.31076	7.11474	0.423677	4.5102	4.23924	0.373244
	Porphyromonas	4.397	7.041	0.2588	4.95614	9.37588	0.516909	3.71645	4.18894	0.249448	4.4592	4.53674	0.399438
	Leptotrichia	3.347	4.451	0.1636	3.02454	4.6236	0.254907	3.41975	4.29802	0.255944	4.01237	4.27876	0.376724
	Actinomyces	2.193	3.6	0.1324	2.09442	3.6097	0.199009	2.48925	3.95456	0.23549	1.79921	2.59648	0.228607
	Gemella	1.839	2.928	0.1076	2.10194	3.72969	0.205624	1.79856	2.007	0.119515	1.25873	2.11669	0.186364
	Haemophilus	0.9942	1.892	0.06954	0.884647	1.96627	0.108404	1.01639	1.77355	0.105613	1.22497	1.93988	0.170797
	Alloprevotella	0.6492	0.9587	0.03524	0.667693	1.03208	0.0569005	0.605225	0.886063	0.0527643	0.69823	0.919887	0.0809915
	Capnocytophaga	0.5865	1.11	0.04079	0.684456	1.24603	0.0686957	0.423934	0.942008	0.0560958	0.692073	1.04243	0.0917809
	Treponema	0.3546	0.9559	0.03514	0.404407	0.975178	0.0537633	0.230643	0.79877	0.0475661	0.498389	1.17362	0.103332
		Overall (all V4V5 saliva)			HNC			Healthy
	V4V5 Primer	Mean	SD	SE	Mean	SD	SE	Mean	SD	SE
	Streptococcus	29.25	16.16	2.621	41.1464	15.9631	5.32104	25.5619	14.5835	2.70809
	Prevotella	13.11	9.345	1.516	16.6886	11.1349	3.71162	11.9952	8.63591	1.60365
	Porphyromonas	12.85	9.891	1.605	6.14312	5.35242	1.78414	14.927	10.1077	1.87696
	Neisseria	9.171	7.647	1.24	4.86992	5.56414	1.85471	10.5059	7.78668	1.44595
	Veillonella	4.835	4.926	0.7992	6.43082	5.47794	1.82598	4.33933	4.7353	0.879324
	Haemophilus	4.24	4.81	0.7802	2.668	4.6716	1.5572	4.7282	4.82632	0.896225
	Alloprevotella	2.886	4.96	0.8046	0.897723	1.60284	0.534281	3.50287	5.48694	1.0189
	Capnocytophaga	2.614	4.658	0.7557	1.58163	1.29378	0.431261	2.93424	5.26771	0.978189
	Actinomyces	2.399	3.217	0.5218	4.31321	5.31258	1.77086	1.8052	2.01661	0.374475
	Gemella	2.35	1.845	0.2992	2.10521	1.47435	0.491449	2.42632	1.96206	0.364345
	Fusobacterium	1.789	2.535	0.4112	1.08321	1.0866	0.362199	2.00821	2.81817	0.523321
	Treponema	1.284	1.831	0.297	1.65824	2.66764	0.889214	1.16821	1.52905	0.283938
	Leptotrichia	1.118	1.257	0.204	1.26372	0.743028	0.247676	1.07291	1.38642	0.257451
	Rothia	0.3022	0.7067	0.1146	0.162864	0.195243	0.0650811	0.345487	0.800558	0.14866
		Overall (all V3V4 oral rinse)			HNC			Healthy
Table S9b: Relative abundance of genera for oral rinse samples	V3V4 oral rinse	Mean	SD	SE	Mean	SD	SE	Mean	SD	SE
	Prevotella	25.77	28.11	1.533	18.1619	17.3452	1.2085	37.8355	36.5264	3.20358
	Neisseria	12.72	19.39	1.058	13.6923	18.5656	1.29352	11.1885	20.6041	1.8071
	Porphyromonas	12.49	21.61	1.179	8.77597	11.106	0.773794	18.3739	30.98	2.71713
	Streptococcus	10.26	15.43	0.8417	15.3127	16.7793	1.16907	2.25558	8.09267	0.709774
	Alloprevotella	6.13	12.88	0.7024	7.11929	14.1463	0.985617	4.56111	10.4135	0.913323
	Fusobacterium	5.349	10.84	0.5914	8.10984	12.9866	0.904819	0.972996	2.37883	0.208637
	Veillonella	4.1	9.244	0.5043	2.96869	4.82119	0.335908	5.89203	13.4043	1.17563
	Haemophilus	3.799	9.218	0.5029	4.31679	8.71676	0.607326	2.97964	9.94034	0.871825
	Gemella	2.582	6.036	0.3293	3.08239	6.32629	0.440774	1.78853	5.47498	0.480187
	Rothia	2.44	5.533	0.3018	2.16042	5.22481	0.364029	2.88415	5.98186	0.524644
	Leptotrichia	1.676	3.669	0.2002	1.83842	3.85775	0.268782	1.41974	3.34784	0.293625
	Capnocytophaga	0.8418	2.077	0.1133	1.34656	2.52414	0.175865	0.0418832	0.173446	0.0152122
	Treponema	0.4837	1.517	0.08276	0.735619	1.88455	0.131303	0.0844329	0.264232	0.0231747
	Actinomyces	0.1916	0.705	0.03846	0.196119	0.641069	0.0446654	0.184408	0.798393	0.0700237

## Sheet: Table S10
Table S10: Differential abundance analysis for saliva and samples. LinDA abundance analysis were performed for each primer set, to determine differences in abundance between HNC - Healthy and HNC - Premalignant samples.
		Primer set	Comparison					Primer set	Comparison					Primer set	Comparison					Primer set	Comparison					Primer set	Comparison
Table S10a: LiNDA abundance analysis for V3V4, V4, V4V5 and V6V8 saliva samples. -log10(Pval) > 1.3010 (p-value < 0.05).		V3V4	HNC - Healthy saliva					V3V4	HNC - Premalignant saliva					V4	HNC - Healthy saliva					V4	HNC - Premalignant saliva					V4V5	HNC - Healthy saliva
		Genera	log2FC	-log10(Pval)	Prevalence	Mean		Genera	log2FC	-log10(Pval)	Prevalence	Mean		Genera	log2FC	-log10(Pval)	Prevalence	Mean		Genera	log2FC	-log10(Pval)	Prevalence	Mean		Genera	log2FC	-log10(Pval)	Prevalence	Mean
		Abiotrophia	2.95502	7.66454	0.157895	0.00206419		Abiotrophia	3.15747	4.64598	0.169014	0.00244098		Bacteroides	1.31193	5.242	0.14239	0.00170252		Actinobacillus	1.96387	9.66159	0.106987	0.00108151		Alloprevotella	-3.65464	0.402448	0.868421	0.0288586
		Candidatus_Saccharimonas	-3.07838	7.25111	0.503759	0.011638		Eikenella	2.33175	3.56996	0.183099	0.00062767		Megasphaera	-1.32997	3.97801	0.438625	0.00448762		Abiotrophia	2.04133	9.49453	0.194323	0.00133251		Porphyromonas	-1.86256	0.352203	1	0.128466
		Eikenella	2.35035	7.13567	0.184211	0.00053297		Candidatus_Saccharimonas	-2.34432	1.70544	0.41784	0.0119115		Lachnoanaerobaculum	-1.10903	3.71434	0.433715	0.00268069		Streptococcus	1.80688	7.11748	0.960699	0.324994		Veillonella	0.378775	0	1	0.0483468
		Veillonella	-3.73535	6.26731	0.612782	0.08561		Fusobacterium	3.15994	1.28136	0.643192	0.123933		Leptotrichia	-1.32947	3.51605	0.739771	0.0320695		Campylobacter	-1.76418	5.29237	0.628821	0.00545056		Treponema	0.352322	0	0.815789	0.0128427
		TM7x	-3.06714	6.16573	0.533835	0.018949		Lentimicrobium	2.0554	1.26029	0.197183	0.00197794		[Eubacterium]_nodatum_group	-0.953356	3.3908	0.337152	0.00100568		Lautropia	1.95135	4.854	0.251092	0.00278965		Tannerella	0.348945	0	0.842105	0.00447182
		Neisseria	-3.4849	6.124	0.631579	0.0786367		Alloprevotella	2.18522	0.451074	0.422535	0.0168849		Mycoplasma	0.820537	3.14887	0.302782	0.000640774		Granulicatella	2.3226	4.45176	0.329694	0.00795469		Streptococcus	0.738623	0	1	0.29253
		Lactobacillus	3.16721	5.9393	0.218045	0.00494595		Capnocytophaga	2.13243	0.361218	0.57277	0.0488423		Neisseria	-1.43832	2.85806	0.765957	0.102984		Atopobium	-1.70952	3.96672	0.598253	0.00783139		Stomatobaculum	-0.153243	0	0.631579	0.00217624
		Haemophilus	-3.14329	5.475	0.398496	0.0202253		Streptococcus	-2.18978	0.242022	0.629108	0.14509		Prevotella	-0.987833	1.19025	0.834697	0.127959		Parvimonas	1.48622	3.68018	0.436681	0.00311275		Selenomonas	-0.361965	0	0.526316	0.00401611
		Fusobacterium	3.83343	5.09153	0.605263	0.104129		Cardiobacterium	1.20415	0.00469446	0.173709	0.000643121		Oribacterium	-0.77794	1.06447	0.414075	0.00321662		Bifidobacterium	1.36075	3.39609	0.194323	0.00101203		Rothia	-0.106284	0	0.631579	0.00302234
		Leptotrichia	-2.75904	4.36926	0.56015	0.0279637		Veillonella	-1.24193	0	0.521127	0.0699166		Stomatobaculum	-0.654785	0.824563	0.327332	0.00120197		TM7x	-1.74666	2.89761	0.604803	0.0144211		Rikenellaceae_RC9_gut_group	0.347645	0	0.473684	0.000869976
		Bifidobacterium	1.82615	3.46664	0.135338	0.00058865		Treponema	0.616761	0	0.652582	0.0245888		Treponema	0.734882	0.78715	0.409165	0.00324208		Rothia	2.15165	2.43378	0.550218	0.0460359		Prevotella	0.368993	0	1	0.131068
		Mycoplasma	1.94341	2.85916	0.364662	0.00508317		TM7x	-0.943589	0	0.441315	0.0175291		Bifidobacterium	0.640088	0.499504	0.165303	0.000805411		Lachnoanaerobaculum	-1.18473	2.2702	0.469432	0.00285502		Peptostreptococcus	0.739703	0	0.947368	0.011508
		Oribacterium	-1.83166	2.69478	0.477444	0.00565375		Tannerella	0.327078	0	0.211268	0.000711193		Veillonella	-0.945358	0.428463	0.829787	0.114875		Mycoplasma	0.902702	2.04669	0.386463	0.000862453		Parvimonas	0.0161467	0	0.894737	0.00528056
		Alloprevotella	-2.31089	2.10818	0.556391	0.0206502		Stomatobaculum	0.70685	0	0.370892	0.00187865		Rothia	-1.06164	0.258683	0.620295	0.0512606		Neisseria	-1.58365	1.83208	0.78821	0.101313		Oribacterium	0.603579	0	0.710526	0.00484114
		Tannerella	-1.39392	1.95206	0.327068	0.00100492		Solobacterium	-0.288471	0	0.333333	0.00166805		Filifactor	0.50319	0.203722	0.312602	0.00122506		Leptotrichia	-1.3172	1.67526	0.753275	0.0330278		Neisseria	-1.97523	0	0.973684	0.0917102
		Porphyromonas	-2.40952	1.80919	0.669173	0.0528754		Selenomonas	-0.491545	0	0.41784	0.0128687		Capnocytophaga	0.499139	0	0.530278	0.00564215		Gemella	1.41627	1.3466	0.615721	0.0186444		Mycoplasma	-0.207475	0	0.368421	0.000753132
		[Eubacterium]_saphenum_group	1.33379	1.80715	0.191729	0.00084781		Rothia	-1.42424	0	0.450704	0.0222367		Lactobacillus	0.489307	0	0.237316	0.00455385		Bacteroides	-1.03518	1.33518	0.275109	0.00373432		Mogibacterium	-1.57822	0	0.552632	0.00135148
		Campylobacter	-1.84278	1.7786	0.537594	0.0130132		Rikenellaceae_RC9_gut_group	0.488068	0	0.211268	0.00163306		Fretibacterium	0.417133	0	0.216039	0.000782452		Catonella	0.737008	1.16425	0.283843	0.000737272		Megasphaera	1.04013	0	0.263158	0.00130613
		Prevotella	-2.31112	1.60242	0.804511	0.213178		Prevotella	1.83828	0	0.723005	0.186625		F0058	0.306815	0	0.176759	0.000286716		Veillonella	1.40185	0.989861	0.79476	0.104008		Leptotrichia	0.941576	0	0.973684	0.011181
		Megasphaera	-1.85954	1.39435	0.424812	0.00747669		Porphyromonas	0.187278	0	0.568075	0.0634479		Streptococcus	0.287398	0	0.967267	0.32132		Fretibacterium	0.734052	0.446143	0.262009	0.00111228		Lautropia	0.656064	0	0.815789	0.00670115
		Lentimicrobium	1.52659	1.22639	0.233083	0.00164036		Peptostreptococcus	1.36705	0	0.356808	0.0115716		Peptostreptococcus	0.244459	0	0.376432	0.00136289		Lactobacillus	0.916831	0.226226	0.259825	0.00704115		Lachnoanaerobaculum	1.10694	0	0.710526	0.00217923
		Lachnoanaerobaculum	-1.34359	1.17002	0.43985	0.00181981		Parvimonas	-0.251089	0	0.328638	0.00228114		Actinobacillus	0.241882	0	0.121113	0.000999104		Treponema	-0.175236	0	0.502183	0.00430877		Haemophilus	-1.77129	0	0.921053	0.0424026
		Atopobium	-1.3896	1.01987	0.409774	0.00357935		Oribacterium	0.239442	0	0.389671	0.00466969		Tannerella	0.129268	0	0.325696	0.000644007		Tannerella	-0.475854	0	0.406114	0.000830545		Granulicatella	0.861217	0	0.973684	0.0187199
		Lautropia	1.35033	0.646224	0.338346	0.00728962		Neisseria	-1.85385	0	0.553991	0.0641234		Abiotrophia	0.121325	0	0.222586	0.00114615		Stomatobaculum	0.228455	0	0.334061	0.00122916		Gemella	-0.0294654	0	0.973684	0.0235027
		Treponema	0.965652	0	0.650376	0.0216928		Mycoplasma	0.0804609	0	0.384977	0.00671175		Parvimonas	0.0665744	0	0.441899	0.00306836		Solobacterium	-0.373236	0	0.438865	0.00136088		Fusobacterium	-1.37545	0	0.973684	0.0178913
		Streptococcus	-0.831077	0	0.650376	0.125352		Megasphaera	0.232598	0	0.338028	0.00559289		Lautropia	0.0405358	0	0.274959	0.00246268		Selenomonas	0.648838	0	0.454148	0.00927647		Fretibacterium	0.0103725	0	0.368421	0.000636093
		Stomatobaculum	-0.887011	0	0.454887	0.00204324		Leptotrichia	-1.28398	0	0.497653	0.0253941		Catonella	-0.00504647	0	0.258592	0.000598465		Prevotella	-0.302246	0	0.836245	0.121157		Filifactor	-0.170544	0	0.552632	0.00170255
		Solobacterium	-0.716558	0	0.394737	0.00167306		Lautropia	0.929939	0	0.333333	0.00847988		Porphyromonas	-0.0417065	0	0.739771	0.0438398		Porphyromonas	-0.626114	0	0.799127	0.0481617		F0058	-0.237496	0	0.578947	0.00222972
		Selenomonas	-0.668627	0	0.473684	0.0108057		Lactobacillus	-0.487461	0	0.305164	0.0070882		Bergeyella	-0.0427811	0	0.355155	0.00101111		Peptostreptococcus	0.293316	0	0.438865	0.00167823		Dialister	-0.105008	0	0.421053	0.000753718
		Rothia	-0.603997	0	0.458647	0.0242564		Lachnoanaerobaculum	1.21209	0	0.328638	0.00126364		Fusobacterium	-0.046419	0	0.770867	0.0467995		Oribacterium	-0.478915	0	0.441048	0.00334146		Corynebacterium	0.0309362	0	0.815789	0.00398716
		Rikenellaceae_RC9_gut_group	0.871295	0	0.24812	0.00129092		Haemophilus	0.0374452	0	0.29108	0.0143702		Alloprevotella	-0.0819134	0	0.620295	0.00638862		Megasphaera	0.154031	0	0.406114	0.00388776		Catonella	-1.14608	0	0.342105	0.000898729
		Peptostreptococcus	1.01425	0	0.398496	0.0093399		Granulicatella	0.0238822	0	0.568075	0.0184185		Granulicatella	-0.10765	0	0.366612	0.00881783		Haemophilus	0.878484	0	0.399563	0.00980503		Capnocytophaga	-0.412207	0	0.973684	0.0261389
		Parvimonas	0.227071	0	0.357143	0.0020143		Gemella	-0.449462	0	0.516432	0.0170208		Haemophilus	-0.25583	0	0.392799	0.00945449		Fusobacterium	-0.475512	0	0.823144	0.0485946		Bergeyella	-1.08895	0	0.868421	0.0037531
		Granulicatella	1.25452	0	0.545113	0.0154661		Fretibacterium	0.722822	0	0.211268	0.00101384		Solobacterium	-0.266792	0	0.381342	0.00116709		Filifactor	0.110181	0	0.395197	0.00158276		Bacteroides	0.0319091	0	0.315789	0.00337059
		Gemella	0.162468	0	0.537594	0.0156298		Filifactor	0.256514	0	0.220657	0.00115901		Candidatus_Saccharimonas	-0.299165	0	0.317512	0.0012523		F0058	-0.400746	0	0.268559	0.000675252		Atopobium	-0.346413	0	0.5	0.00117985
		Fretibacterium	0.026244	0	0.270677	0.0010622		F0058	0.754737	0	0.300469	0.00157644		Atopobium	-0.338773	0	0.500818	0.00641253		Corynebacterium	0.240621	0	0.292576	0.00127053		Aggregatibacter	-0.117237	0	0.315789	0.00276322
		Filifactor	0.127964	0	0.255639	0.0011664		Dialister	-1.16869	0	0.342723	0.00313894		Campylobacter	-0.403414	0	0.543372	0.0044929		Capnocytophaga	-0.672987	0	0.617904	0.00686602		Actinomyces	1.67655	0	0.868421	0.023992
		F0058	0.101635	0	0.349624	0.00159261		Corynebacterium	1.1661	0	0.276995	0.00159832		Aggregatibacter	-0.456891	0	0.351882	0.00203761		Candidatus_Saccharimonas	-0.434142	0	0.377729	0.00135766		Actinobacillus	-1.04868	0	0.184211	0.00226387
		Dialister	-0.297159	0	0.360902	0.0027638		Catonella	-0.775136	0	0.413146	0.00395896		Corynebacterium	-0.46647	0	0.288052	0.00135329		Bergeyella	0.173134	0	0.406114	0.00109359		Abiotrophia	1.93904	0	0.315789	0.00100748
		Corynebacterium	0.897919	0	0.293233	0.00206089		Campylobacter	-0.566439	0	0.469484	0.0118474		Selenomonas	-0.667649	0	0.466448	0.00978717		Alloprevotella	0.0805902	0	0.650655	0.00676294		[Eubacterium]_saphenum_group	0.905186	0	0.184211	0.000632381
		Catonella	-0.14738	0	0.432331	0.00349641		Butyrivibrio	1.00339	0	0.164319	0.000844998		TM7x	-0.708532	0	0.528642	0.0128877		Aggregatibacter	0.603844	0	0.336245	0.00204549		[Eubacterium]_nodatum_group	-1.18846	0	0.684211	0.00355652
		Cardiobacterium	0.811626	0	0.206767	0.00064376		Bifidobacterium	-0.195022	0	0.169014	0.000960055		Gemella	-0.722287	0	0.651391	0.0196192		Actinomyces	1.01609	0	0.548035	0.0201127		[Eubacterium]_brachy_group	0.657584	0	0.236842	0.000690359
		Capnocytophaga	0.164306	0	0.646617	0.0417443		Bergeyella	-0.0330862	0	0.201878	0.000446902		Actinomyces	-0.783547	0	0.577741	0.0227665		[Eubacterium]_nodatum_group	0.120031	0	0.329694	0.000799722
		Butyrivibrio	0.760223	0	0.191729	0.00070371		Atopobium	-0.143712	0	0.333333	0.00293461
		Bergeyella	-0.49186	0	0.266917	0.00055872		Aggregatibacter	0.607242	0	0.192488	0.0013089
		Aggregatibacter	-0.276007	0	0.25188	0.0015658		Actinomyces	-0.632162	0	0.431925	0.00626924
		Actinomyces	-0.310396	0	0.432331	0.0090178		Actinobacillus	1.15451	0	0.0751174	0.00135454
		Actinobacillus	0.828082	0	0.131579	0.00058472		[Eubacterium]_saphenum_group	-0.377404	0	0.201878	0.00144855
		[Eubacterium]_nodatum_group	-0.332774	0	0.315789	0.00122559		[Eubacterium]_nodatum_group	-0.800363	0	0.276995	0.00139474
Table S10b: LiNDA abundance analysis for V3V4 oral rinse samples. -log10(Pval) > 1.3010 (p-value < 0.05)		Primer set	Comparison
		V3V4	HNC - Healthy Oral rinse
		Genera	log2FC	-log10(Pval)	Prevalence	Mean
		Streptococcus	7.16208	59.2654	0.616071	0.102608
		Fusobacterium	4.01827	15.8901	0.529762	0.0534856
		Capnocytophaga	2.97416	17.0277	0.410714	0.00841776
		Gemella	2.7477	9.11587	0.46131	0.0258179
		Veillonella	1.92045	3.15832	0.5625	0.0409974
		Alloprevotella	1.70023	2.28021	0.595238	0.0612952
		Campylobacter	1.27618	1.84805	0.482143	0.0153368
		Treponema	1.02223	1.44437	0.285714	0.00483672
		TM7x	-0.878234	1.72044	0.125	0.00235912
		Solobacterium	-1.08854	5.22428	0.10119	0.000544781
		Porphyromonas	1.12792	0.314106	0.699405	0.124895
		Haemophilus	1.09376	0.273616	0.3125	0.0379944
		Neisseria	0.914821	0	0.47619	0.127236
		Granulicatella	0.650694	0	0.267857	0.00905022
		Leptotrichia	0.519907	0	0.401786	0.0167643
		Prevotella	0.455719	0	0.910714	0.257737
		Atopobium	0.166541	0	0.136905	0.00155574
		Catonella	0.166226	0	0.110119	0.00137523
		Parvimonas	0.153071	0	0.110119	0.00154662
		Dialister	0.0398597	0	0.104167	0.00101023
		Bergeyella	-0.0247943	0	0.190476	0.00261035
		Rothia	-0.0696057	0	0.470238	0.0244044
		Lentimicrobium	-0.146883	0	0.127976	0.00539663
		Tannerella	-0.219517	0	0.145833	0.00106836
		Peptostreptococcus	-0.264573	0	0.110119	0.00284105
		Mycoplasma	-0.284317	0	0.10119	0.00269035
		Megasphaera	-0.397943	0	0.122024	0.00586968
		Actinomyces	-0.432791	0	0.14881	0.00191588
